1 **The landscape of coadaptation in *Vibrio parahaemolyticus***

2 Yujun Cui<sup>1\*#</sup>, Chao Yang<sup>1#</sup>, Hongling Qiu<sup>2#</sup>, Hui Wang<sup>2,3</sup>, Ruifu Yang<sup>1</sup>, Daniel Falush<sup>4\*</sup>

3

4 *1 State Key Laboratory of Pathogen and Biosecurity, Beijing Institute of Microbiology and*

5 *Epidemiology, Beijing 100071, China;*

6 *2 Institute for Nutritional Sciences, Chinese Academy of Sciences, Shanghai 200031, China*

7 *3 School of Public Health, Shanghai Jiao Tong University School of Medicine, Shanghai 200025,*

8 *China*

9 *4 University of Bath, Bath, Somerset, United Kingdom*

10

11 #These authors contributed equally to the article

12 \* Corresponding authors: D. F. ([danielfalush@googlemail.com](mailto:danielfalush@googlemail.com)) or Y. C. ([cuiyujun.new@gmail.com](mailto:cuiyujun.new@gmail.com))

13

14

15

## 16 **Abstract**

17 *Vibrio parahaemolyticus* is a human gastrointestinal pathogen that thrives in warm brackish  
18 waters and is unusual amongst bacteria in having a population structure that approximates  
19 panmixia. We take advantage of this structure to perform a genome-wide screen for  
20 coadapted genetic elements. There are 93 groups of coadapted genome fragments were  
21 identified, with total length of 1.5 Mb and involved 1,703 coding genes. The great majority of  
22 interactions (85%) that we detect are between accessory genes, many involved in  
23 carbohydrate transport and metabolism. The rarity of interactions involving the core genome  
24 provides evidence for a plug and play-like architecture, in which elements have evolved to be  
25 functional immediately on arrival in a new organism. 12% of interaction were observed  
26 between core and accessory genome regions. The most complex interactions we identify  
27 include hundreds of core genome SNPs as well as accessory genome elements, which are  
28 organized into a hierarchical structure that implies progressive coadaptation. These  
29 interactions involve genes encoding lateral flagella and cell wall biogenesis, implying that  
30 several genetically distinct strategies have evolved for colonizing surfaces. The extensively  
31 coadapted genetic elements identified in this study indicated that as in human relationships,  
32 coadaptation involves progressively increasing levels of commitment, with the most involved  
33 interactions becoming irreversible and presaging speciation. Our approach provides new  
34 insight into how selection for phenotypic diversity shapes genetic variation within species.

35

## 36 **Introduction**

37 The importance of coadaptation to evolution was recognized by Darwin in the 6<sup>th</sup> edition of  
38 Origin of Species, where he wrote: "In order that an animal should acquire some structure  
39 specially and largely developed, it is almost indispensable that several other parts should be  
40 modified and coadapted" (1). As Darwin's argument implies, complex phenotypic innovation

41 require adaptation at multiple genes and it is inevitable that some of the changes involved  
42 will be costly on the original genetic background, implying epistasis - i.e. non-additive fitness  
43 interactions - between adaptive loci.

44

45 The consequences of epistasis for the evolution of phenotypic diversity depends on the  
46 transmission genetics and the population structure of the species in question. For example, in  
47 outbreeding animals mating mixes up variation each generation, with the result that genes  
48 only increase in frequency if they have high average fitness across genetic backgrounds (2).  
49 Consequently, extensive linkage disequilibrium due to natural selection is rare (3) and it is  
50 difficult to maintain dissimilar genetic strategies concurrently in the same population unless  
51 the strategies are encoded by a small number of loci. This means that the coadaptation  
52 necessary for extensive phenotypic diversification can only take place when facilitated by  
53 barriers to gene flow, such as geographical separation, mate choice or the suppression of  
54 recombination for example by inversion polymorphisms (4, 5). This feature also makes it  
55 difficult to study the process of complex coadaptation without temporally sampled genetic  
56 data, which remains rare despite the advent of technology for sequencing ancient DNA.

57

58 In bacterial populations, mutations do not need to have high average fitness across all genetic  
59 backgrounds to reach a substantial frequency in the population. For example, *Vibrio*  
60 *parahaemolyticus* lives in coastal waters and causes gastroenteritis in humans and  
61 economically devastating diseases in farmed shrimps. It is capable of replicating in less than  
62 10 minutes in appropriate conditions (6), while the doubling time in the wild of the related  
63 bacteria *Vibrio cholerae* has been estimated as slightly over an hour (7). Approximately  
64 0.017% of the genome recombines each year (8), implying that there are approximately 50  
65 million generations on average between recombination events at a given genetic locus. As a

66 result, mutations that are beneficial only on specific backgrounds have a chance to rise to  
67 high frequency on those backgrounds even if they are harmful on others. Epistatic  
68 interactions that involve only small selective coefficients  $s$  (for example  $s = 1.0 \times 10^{-4}$ ) can  
69 create an imprint on the genome in the form of strong linkage disequilibrium (9). These  
70 arguments imply that extensive complex coadaptation can potentially accumulate within a  
71 single population.

72

73 Although recombination happens slowly on the timescale of bacterial generations, the Asian  
74 population of *V. parahaemolyticus* has had a large effective population size for at least the  
75 last 15,000 years, or approximately 130 million bacterial generations, over which time  
76 recombination has been extensive enough to have almost completely scrambled genetic  
77 variation (10). As a result, the population is unusual amongst bacteria in that there is  
78 approximate linkage equilibrium between most loci greater than 3 kb apart on the  
79 chromosome (10). This feature increases the power of tests for interaction based on  
80 identifying non-random associations, which relies on identifying the same combination of  
81 alleles on independent genetic backgrounds and can therefore be confounded by clonal or  
82 population structure unless this is appropriately controlled for.

83

84 We perform a systematic screen for coadaptation in the core and accessory genome, based on  
85 a larger sample of genomes than Cui et al. 2015 (11), here for the first time performing a  
86 screen for the co-occurrence of accessory genome elements. We have taken a conservative  
87 approach to identifying statistical associations, rigorously filtering the set of genomes used in  
88 our discovery dataset to eliminate any hint of population structure. We performed more than  
89 14 billion Fisher exact tests between variants in the core and accessory genomes, using a cut-



90 off of  $P < 10^{-10}$  with the aim of assembling a comprehensive list of common genetic  
91 variants that have strong linkage disequilibrium between them due to fitness interactions.

92

93 We find that the great majority of interactions involve small numbers of accessory genome  
94 elements, with surprisingly little involvement of the core genome. However, we also identify  
95 three complex multi-locus interactions, in which core and accessory genomes have evolved in  
96 parallel to create coadapted gene complexes with distinct strategies. We demonstrate the  
97 value of hierarchical clustering in characterizing these interactions. Our results demonstrate  
98 that *V. parahaemolyticus* have progressively modified their own fitness landscape through  
99 coadaptation and demonstrate the fundamental importance of lateral flagella variation to their  
100 ecology. Taken together, our results provide a starting point for systematically investigating  
101 fitness landscapes in natural populations while highlighting several methodological  
102 challenges.

103

## 104 **Results**

### 105 **Detection and characterization of interaction groups**

106 To avoid false positives due to population structure, we restricted our initial analysis to the  
107 strains from the Asia population, VppAsia, within our global collection of 1,103 isolates  
108 (Table S1) and iteratively removed isolates until there was no sign of clonal structure  
109 (Methods), leading to a discovery dataset of 198 strains (Figure 1a, Figure S1). We  
110 performed a Fisher exact test of associations between all pairwise combinations of 151,957  
111 SNP variants within the core and 14,486 accessory genome elements. As has been observed  
112 previously (11), most of strong associations occurred between sites within 3 kb on the  
113 chromosome (Figure 1b). In order to exclude associations that arise only due to physical  
114 linkage, we excluded all sets of associations that spanned less than 3 kb, including between

115 accessory genome elements. This left us with 452,849 interactions with  $P < 10^{-10}$ , which  
116 grouped into 90 networks of associated elements, all of which involved at least one  
117 accessory-genome element, with 8 also including core genome SNPs and 38 of which  
118 included multiple genome regions. In total these networks included 1,936 SNPs in 110 core  
119 genes and 1,593 accessory genome elements (Table 1, Table S2 and Table S3). Interacting  
120 SNPs were substantially enriched for non-synonymous variants, which is consistent with  
121 natural selection being the force generating the linkage disequilibrium we detected.

122

123 The largest network (network 1) accounted for the majority of interacting SNPs as well as a  
124 significant fraction of accessory genome elements (Table 1). Hierarchical clustering of the  
125 interacting elements in this network based on  $P$  values (Figure 1c) revealed a complex pattern  
126 of interactions but with differentiated sub-networks and we defined three large interaction  
127 groups (IGs), IG1, IG2 and IG3 within it, placing remaining interactions within IG4. IG4-93  
128 are displayed in Figure 2, 3, Table S3 and Figure S2, while IG1-3 are shown separately in  
129 Figures 4, 5 and Table S2.

130

131 We compared our results for core genome interactions with those obtained by SuperDCA, a  
132 method that uses Direct Coupling Analysis to identify causal interactions (12, 13), using the  
133 default settings for the algorithm. To make the results as directly comparable as possible we  
134 used the same 198 isolates that were used for the Fisher exact test. The most important  
135 discrepancy is that although IG1 involves perfect associations, with  $P$  values as low as  $1.4 \times$   
136  $10^{-30}$ , the coupling strengths are lower than for the other groups we identified and none  
137 appear amongst the top 5,000 couplings. This discrepancy is due the large number of SNPs  
138 involved with similar association patterns, which means that coupling values are distributed  
139 between them (Figure 1d, Figure S3). Excluding IG1 SNPs, there is a strong correlation

140 between SuperDCA coupling strengths and Fisher exact test  $P$  values (Figure 1e). At a  
141 stringent cutoff of  $10^{-2.2}$ , SuperDCA identifies the same multi-locus interactions as Fisher  
142 exact test does at  $P < 10^{-10}$ , with a few SNPs excluded (Figure 1f). The significance  
143 thresholds for both the Fisher exact test and SuperDCA could be relaxed to identify a  
144 substantially larger number of true-positive hits, at the likely expense of some false ones, but  
145 we do not investigate these associations further here. We also compared our results with  
146 those obtained by SpydrPick, a model-free method based on mutual information (MI) (14).  
147 The Fisher exact test  $P$  value is almost perfectly correlated with the MI statistic used by  
148 SpydrPick for this data (Figure 1e).

149

150 For IG1-4, COG classes M and N, cell wall biosynthesis and cell motility, are substantially  
151 overrepresented, relative to their overall frequency in the genome (Figure 2c, Fisher exact  
152 test,  $P < 0.01$ ). Amongst the other interaction groups, class G, encoding carbohydrate  
153 transport and metabolism are substantially overrepresented (Fisher exact test,  $P < 0.01$ ),  
154 particularly amongst groups involving incompatibilities. There are also differences in GC  
155 content between accessory genes in IGs and others (Figure 2c), with IGs having higher mean  
156 values, especially in compatibility IGs.

157

### 158 **Structure of variation within interaction groups**

159 For each interaction group, we investigated how genetic variation was structured within the  
160 *V. parahaemolyticus* population using a larger “non-redundant” set of 469 strains, which  
161 includes isolates from all four of the populations identified in (8), but excludes closely related  
162 isolates, differing at less than 2,000 SNPs. We performed hierarchical clustering of the strains  
163 based on the interaction group variants (Figure 3, 4, 5, S2). We also used the criterion used  
164 by ARACNE and SpydrPick (14, 15) to remove putatively non-causal connections between

165 pairs of loci that were mutually connected by statistically more significant connections to  
166 third loci than they are to each other.

167

168 The most common type of interaction group is a single accessory genome region of between  
169 3 kb (IG53) and 57 kb (IG41), of which there are 52 (Figure 2). For example, IG5 consists of  
170 10 genes in a single block. 9 of the genes code for various functions related to carbohydrate  
171 metabolism and transport while the 10<sup>th</sup> is a transcriptional regulator (Figure 3 and Table S3).  
172 Four strains have 9 out of the 10 genes but otherwise the genes are either all present or all  
173 absent in every strain. Interestingly, there appears to be a difference in frequency between  
174 VppAsia isolates and others, with the island present in 52% of VppAsia strains and 90% of  
175 others.

176

177 Genome islands are often associated with transmission mechanisms such as phage and  
178 plasmids (16). In our data, one example is IG17 which contains 4 genes annotated as being  
179 phage related and a further 19 hypothetical proteins (Figure 3). In the reference strain, 16 of  
180 the genes occur in a single block VP1563-VP1586, while 7 genes are present elsewhere in the  
181 genome. 56% of the 469 strains had none of the genes, while 36% had more than 12 of them  
182 and 8% had between 1 and 5, which presumably represent remnants of an old phage  
183 infection. Only one gene (VP1563) in IG17 was found in appreciable frequency in strains that  
184 had none of the other genes. This gene might represent cargo of the phage infection that is  
185 able to persist for extended periods in the absence of infection due to a useful biological  
186 function of its own.

187

188 Another common interaction is incompatibility between different accessory genome  
189 elements, which is found in total 27 of the interaction groups (Figure 2). For example, all of

190 the 469 strains either have the gene *yniC*, which is annotated as being a phosphorylated  
191 carbohydrates phosphatase, or at least 4 out of a set of 5 genes VP0363-VP0367 that includes  
192 a phosphotransferase and a dehydrogenase (IG6, Figure 3) in the same genome location. Only  
193 one strain has both sets of genes. This interaction also involves a core genome SNP, in the  
194 adjacent gene VP0368, which is annotated as being a mannitol repressor protein. Another  
195 pattern is found in IG45 (Figure 3), where there are three genes that are mutually  
196 incompatible in our data, and 12% strains have none of the three genes. Only one of the three  
197 genes is annotated.

198

### 199 **More detailed characterization of IG1-3**

200 For IG1, the clustering revealed that strains fall into two cleanly differentiated groups (Figure  
201 4a). Amongst the 469 non-redundant set, there are 43 strains from VppAsia and 1 strain from  
202 VppUS2 in the minor group that we call eco-group 1.2, or EG1.2, with the remaining 425  
203 belong to EG1.1. Chromosome painting (Figure 4b) shows evidence for sharp peaks of  
204 differentiation of EG1.2 strains around the IG1 loci but with little evidence for differentiation  
205 elsewhere (see the expected value revealed by vertical dot line). This pattern is qualitatively  
206 distinct either for that observed between geographically differentiated populations or for  
207 clonally related strains, which show higher-than-expected copying throughout the genome  
208 but without sharp peaks (Figure S4). The composition of accessory genes also differs  
209 markedly between eco-groups, in particular because EG1.2 strains has a particularly complex  
210 polymorphic region (Ref2-09, 82 kb, Figure 4b) with substantial variation in gene content  
211 between strains, which in total constitutes for a large fraction of the gene content (57 genes)  
212 not shared with EG1.1 strains. Based on the annotation of these genes (Table S2), this region  
213 might encode a type II secretion system.

214

215 After removing putatively non-causal connections using the ARACNE criteria (15), there are  
216 still too many connections to make causal inferences for IG1 (Table S4), with multiple  
217 different genome regions retaining connections to 11 different genome blocks (Figure 4a,  
218 Table S2), reflecting the large number of sites in perfect or near-perfect linkage  
219 disequilibrium with each other. However, hierarchical clustering based on IG1 SNPs helps to  
220 identify coherent patterns amongst interacting SNPs. We split the genetic variants into three  
221 tiers, shown in red, blue and green. Tier 1 variants distinguish cleanly, or nearly cleanly  
222 between EG1.1 and EG1.2 strains. Tier 2 variants are similar but with more discrepancies,  
223 while Tier 3 variants are typically fixed or nearly fixed within one eco-group and  
224 polymorphic within the other. Each of the tiers includes multiple core and accessory genome  
225 regions. Some regions are represented in only one tier, while others contain two or more. For  
226 example, the lateral flagellar gene cluster (Ref1-23, VPA1538-VPA1557, Figure 4c) contains  
227 383 Tier 1 SNPs, 24 from Tier 2 and 47 from Tier 3, however the extent of the region  
228 spanned by Tier 1 SNPs is smaller, so that for example *flhA* and *flhB*, at the center of the gene  
229 cluster only contain Tier 3 SNPs, while *lafK* and *lafA* to the left and *filS* to the right contain  
230 multiple fixed differences between eco-groups. In other regions of this genome cluster, Tier 1  
231 SNPs are flanked by those from other tiers.

232

233 IG2 includes 548 SNPs and 130 accessory genes which located in 26 regions (Figure 5a),  
234 including a *LuxR* family transcriptional regulator (Ref1-11), T6SS (type VI secretion system,  
235 Ref1-05), and cellulose synthesis related genes (Ref2-02) that had been identified in our  
236 previous research (11). Here with increased statistical power with more genome sequences,  
237 we found additional interacting loci. Tier 1 contains the T6SS and the cellulose synthesis  
238 related genes, reflecting their strong incompatibility, with nearly all EG2.1 strains containing  
239 a T6SS and all those in EG2.2 containing genes annotated as part of the biosynthesis cluster.

240 There are also SNPs in a hypothetical protein, VPA1081 (Ref1-10) that have a very similar  
241 distribution amongst strains to T6SS presence/absence, suggesting strong functional linkage.  
242 Tier 2 contains mostly SNPs in core genome, which are located at *LuxR* family  
243 transcriptional regulator and uridine phosphorylase encoding genes (Ref1-10). Tier 3 contains  
244 85% of all variants in IG2, which encoded genes that functional related with biogenesis of  
245 elements in cell membrane, carbohydrate transport and metabolism, and transcriptional  
246 regulators.

247

248 Although the ARACNE filtering left too many interactions to be immediately useful in causal  
249 inference, it did highlight one additional gene as potentially being particularly important. The  
250 single accessory gene in Tier2, group\_3560 (Ref2-10), codes for a polysaccharide  
251 biosynthesis/export protein and retains interactions with 9 genome blocks after filtering, 3  
252 more than any other IG2 gene (Table S2). The large number of causal interactions inferred  
253 for this gene reflects its strong association with a sub-cluster of strains within EG2.2, labelled  
254 as EG2.2b (Figure 4a), which is stronger than for any other genetic element, including the  
255 SNPs in the *LuxR* transcriptional regulator genes. The remaining strains EG2.2a include all  
256 EG1.2 strains and others. These results suggest that amongst strains lacking the T6SS, there  
257 are three distinct strategies, one of which is determined by presence or absence of  
258 group\_3560, the second is determined by the large number of SNPs and genes in IG1.2  
259 discussed above, while the third is too rare in our sample to be categorized, even  
260 provisionally, but seems to be associated with presence of a handful of the genes in blocks  
261 Ref1-02 and Ref1-08.

262

263 In part due to this diversity of strategies, the overall strength of the associations in the IG2  
264 Tiers we have defined are generally weaker than those for IG1: while there are a handful of

265 core genome regions where EG2.1 regions are differentiated (Figure 5a), none of these is as  
266 clear-cut as the differentiated regions of IG1.

267

268 The loci of IG3 only covered eight genome regions, which contained 75 SNPs and 65  
269 accessory genes, most of which are found in a single genome regions which includes the core  
270 gene *TonB3* (VP0163, Ref1-01) (17) (Figure 5b). Clustering based on variants of IG3  
271 revealed a stair-like structure of variation. Tier 1 variants differentiate EG3.1 from other eco-  
272 groups and include multiple SNPs in *TonB3* and in the lateral flagellar gene cluster (Ref1-  
273 04). Tiers 2 and 3 variants differentiate between EG3.2, EG3.3 and EG3.4, which are  
274 progressively more different from EG3.1, both in terms of accessory genome complement  
275 and core genome SNPs. Many of the accessory genes specific to EG3.4 are annotated to have  
276 functions associated with cell wall biogenesis (Ref2-01). Once again, a large number of  
277 interactions were left after ARACNE filtering (Table S2, S4), frustrating explicit causal  
278 inference using this approach.

279

## 280 **Phenotypic differences between EG1.1 and EG1.2**

281 We performed a preliminary analysis of the phenotypic differences underlying EG1 by  
282 determining the motility, growth rate, and biofilm formation ability (Figure 6) of in 7 EG1.1  
283 and 4 EG1.2 strains on laboratory media. We failed to observe differences in swimming or  
284 swarming capability under the conditions tested but EG1.2 strains revealed significantly  
285 higher biofilm formation ability and faster growth rate than EG1.1 strains (Figure 6b and 6c),  
286 and they revealed rough colony morphology, also an indication of increased biofilm  
287 formation, under low salinity (1% NaCl) culture condition (Figure 6c).

288



289 There are in total 60 EG1.2 strains in the global collection of 1103 *V. parahaemolyticus*  
290 strains. All but one, a VppUS2 isolate, is from the VppAsia population, with the majority (n=  
291 48, 80%) in this study coming from routine surveillance on food related environmental  
292 samples, including fish, shellfish, and water used for aquaculture. The strains revealed no  
293 clear geographical clustering pattern in China, as they can be isolated from all six provinces  
294 that under surveillance. Notably, only 4 EG1.2 strains were isolated from clinical samples,  
295 including wound and stool, representing a lower proportion than for EG1.1 isolates  
296 (453/1043), including if the two pandemic lineages are removed (268/798), suggesting this  
297 eco-group has low virulence potential in humans.

298

## 299 **Discussion**

300 Bacterial traits such as pathogenicity, host-specificity and antimicrobial resistance naturally  
301 attract human attention but less obvious or even cryptic traits might be more important in  
302 determining the underlying structure of microbial populations. Studies of coadaptation based  
303 on genome sequencing of thousands of isolates have the potential to provide new insight into  
304 the ecological forces shaping natural diversity, and how that variation is assembled by  
305 individual strains to overcome the manifold challenges involved in colonizing specific niches,  
306 such as the human gastrointestinal tract. In other words, these studies provide a unique  
307 opportunity to see the world from the point of view of a bacterium.

308

309 We performed a genome wide scan for coadaptation in *V. parahaemolyticus*, performing  
310 pairwise tests for interactions amongst genetic variants and then clustered the significant  
311 pairwise interactions into 93 interaction groups. Our analysis demonstrated that genome wide  
312 epistasis scans can be used successfully to identify diverse interactions involving both core  
313 and accessory genomes but also highlighted unsolved methodological challenges.

314

315 Firstly, pairwise tests should, at least in principal, have reduced statistical power compared to  
316 methods that analyze all of the data at once, such as Direct Coupling Analysis (DCA) (12).  
317 However, while there was a strong correlation between DCA and our results for core-genome  
318 interactions, DCA failed to identify the clearest, most extensive interaction in our dataset,  
319 namely IG1. DCA was designed to identify coupling interactions that take place during  
320 protein folding and implicitly entails that pairwise interaction between a given pair of sites  
321 make it less likely that other sites will interact with either of them. For many types of  
322 interaction, a prior that makes the opposite assumption seems more appropriate, for example  
323 because master regulation loci are likely to interact with many different sites. Thus, in order  
324 to develop statistical tests that exploit the full power of genomic data, new types of statistical  
325 test that search for a more diverse range of interactions would need to be developed.

326

327 Second, distinguishing direct associations – either through gene function or ecology – from  
328 those that arise due to mutual correlation with other interacting genes, is a substantial, and  
329 largely unaddressed challenge. For the complex interaction groups in our data, the criteria  
330 used by ARACNE (15) to remove interactions still left far too many interactions to be  
331 interpreted usefully as being causal. We found that hierarchical clustering organized the  
332 interactions in a manner that allowed informal interpretation but once again new statistical  
333 methodology is needed to facilitate detailed dissection of associations.

334

335 Notwithstanding the unresolved challenges, our results highlight the central role of lateral  
336 motility in structuring ecologically significant variation within the species. We also find  
337 evidence that interactions move through progressive stages, analogous to differing degrees of

338 commitment within human relationships, namely casual, going steady, getting married and  
339 moving out together (Figure 7).

340

### 341 **Most interactions between core and accessory genomes are casual**

342 A recent debate about whether the accessory genome evolves neutrally (18-20) highlighted  
343 how little we know about the functional importance of much of the DNA in bacterial  
344 chromosomes. Using the same statistical threshold to assess significance, our interaction  
345 screen identifies many more examples of coadaptation between different accessory genome  
346 elements than of interactions between the core and accessory genomes or within the core  
347 genome, implying that natural selection has a central role in determining accessory genome  
348 composition.

349

350 Unsurprisingly, given the extensive literature highlighting the importance of genomic islands  
351 to functional diversity of bacteria (16), the most common form of adaptation detected by our  
352 screen is the coinheritance of accessory genome elements located in the same region of the  
353 genome. Based on a minimum size threshold of 3 kb, we find 52 (56%) such interactions, the  
354 largest of which is 57 kb (Table S3).

355

356 Previous approaches to detecting genome islands emphasize traits associated with horizontal  
357 transmission, for example based on differences in GC content with the core genome, the  
358 presence of phage-related genes or other markers of frequent horizontal transfer (21). Our  
359 approach, based simply on co-occurrence identifies a wider range of coinherited units and  
360 suggests that many islands have functions related to carbohydrate metabolism.

361

362 Amongst interactions not involving physical linkage, the most common is incompatibility of  
363 different accessory genome elements, representing 29% (27/93) of our IGs. For example, two  
364 different versions of phosphorous pathway, one involving one gene, the other involving 5  
365 (IG6, Figure 3).

366

367 We propose that the rarity of interactions between core and accessory genome in our scan  
368 reflects the evolution of “plug and play”-like architecture for frequently transferred genetic  
369 elements. Accessory genome elements are more likely to establish themselves in new host  
370 genomes if they are functional immediately on arrival in many genetic backgrounds.

371 Furthermore, from the point of view of the host bacteria, acquisition of essential functions in  
372 new environments is more likely if diverse accessory genome elements in the gene pool are  
373 immediately functional on arrival in the genome.

374

### 375 **Sometimes it makes sense to go steady**

376 When an accessory genome element with an important protein coding function arrives in a  
377 new genome, it is likely that some optimization of gene regulation will be possible,  
378 coordinating the expression of the gene with others in the genome. We found 11 different  
379 interaction groups involving core and accessory genome regions. One simple example  
380 included a regulatory gene VP0368 and an accessory genome element (IG6, Figure 3). In this  
381 example, it is feasible for the core genome SNP and the associated accessory element to be  
382 transferred together between strains in a single recombination event. Where coadaptation  
383 involves two or more separate genome regions, this makes assembling fit combinations more  
384 difficult and is likely to slow down the rate at which strains gain and lose the accessory  
385 genome elements involved. This higher degree of fidelity in turn makes further coadaptation  
386 at additional genes more likely.

387

388 IG2, is an example of a complex coadaptation involving multiple core and accessory genome  
389 regions. A large majority of strains in our dataset (439/469) either carry a cluster of genes  
390 encoding a T6SS, or a cluster encoding cellulose biosynthesis genes, but few strains have  
391 genes from both clusters (Figure 5a). Cells uses the T6SS to inject toxins into nearby bacteria  
392 (22) and cellulose production to coat themselves in a protective layer (23). Incompatibility  
393 might have a functional basis, for example because cellulose production prevents the T6SS  
394 functioning efficiently, or an ecological one, for example because cells that attack others do  
395 not need to defend themselves. The evolution of dissimilar strategies has led to differentiation  
396 in gene/SNP frequencies in a large number of regions, including the variants in IG1 and IG3,  
397 that presumably also represent functional or ecological coadaptations to these two distinct  
398 strategies.

399

#### 400 **Marriage changes everything**

401 IG1 differs from the other interaction groups in our scan in both the number of associated  
402 regions and the strength of the associations. The interaction group include 454 SNPs in the 19  
403 gene 18 kb lateral flagellar gene cluster (VPA1538-1557, Figure 4c), a further 917 core  
404 genome SNPs in 62 genes and 152 accessory genes in 35 clusters. Strains cluster cleanly into  
405 two groups, the more common group being designated EG1.1 and the rarer EG1.2.  
406 Comparison with closely related species shows that the polymorphisms distinguishing EG1.1  
407 and EG1.2 have evolved *de novo* within *V. parahaemolyticus*, with the EG1.2 variant  
408 undergoing faster evolution (Figure S5).

409

410 Many of the accessory genes and SNPs are in perfect or near perfect disequilibrium with  
411 SNPs in the flagellar gene cluster. These include loci encoding flagellar genes, T2SS and

412 other membrane transport elements. There are also 285 loci (27%, Tier 3) in weaker  
413 disequilibrium, typically because they are polymorphic in one of the eco-groups. Many of  
414 variants are likely to represent more recently evolved coadaptation. Some of these genes are  
415 also associated with flagella or the T2SS related function but also encompass a broader range  
416 of functional categories, including cell division and amino acid transport and metabolism  
417 (Table S2).

418

419 Our laboratory phenotype experiments (Figure 6) suggest that biofilm formation is likely to  
420 be a key trait underlying the different ecological strategies of EG1.1 and EG1.2, but the  
421 variation in phenotypic response at different salinity levels and the absence of measurable  
422 difference in swarming behavior, despite the large genetic difference within the lateral  
423 flagella genes, highlight some of the manifold difficulties of interpreting natural variation  
424 using phenotypes measured under laboratory conditions.

425

426 Despite the extensive differences that have accumulated between EG1.1 and EG1.2, there is  
427 no evidence of restricted gene flow in most of the genome (Figure 4b), and even within the  
428 flagellar gene cluster strongly differentiated regions are separated by a weakly differentiated  
429 one (Figure 4c), implying that the coadaptation is being maintained by selection in the face of  
430 frequent recombination. Initial divergence in flagellar function is likely to have led to  
431 ecological differentiation, which led to bacteria having different nutritional inputs or  
432 requirements and a broadening of the functional categories undergoing divergent selection.

433

434 How can the difference between IG1 and the other interaction groups in both the number of  
435 associations and their strength be explained? *V. parahaemolyticus* is ubiquitous in shellfish in  
436 warm coastal waters, within which it occurs at densities of around 1,000 cells per gram, so a

437 back of the envelope calculation suggests there are likely to be substantially more than  $10^{15}$   
438 bacteria in the VppAsia population. The species also has a high estimated effective  
439 population size (10, 11) and has strong codon bias, which is often argued to be evidence that  
440 even tiny selective coefficients can drive adaptation (24). Furthermore, recombination only  
441 breaks up linkage disequilibrium between loci slowly. Therefore, weaker and more variable  
442 patterns of association within IG2 and IG3 than in IG1 is unlikely to be a simple consequence  
443 of the ineffectiveness of selection and is instead likely to reflect complexity in the fitness  
444 landscape.

445

446 Strains gain flexibility by being able to switch between or modulate genomically encoded  
447 strategies by homologous recombination. For example, expression of the T6SS might be  
448 essential for survival in crowded habitats but detrimental in sparsely populated ones.

449 Recombinants between EG2.1 and EG2.2 at IG2 loci might represent transient adaptation of  
450 strains to their immediate environment or long-term adaptation of intermediate strategies.

451 Furthermore, the phenotypic consequences of IG2 variants can depend on other loci in the  
452 genome, such as IG1 variants, which is likely to reduce the strength of associations within  
453 IG2. Crucially, the evolution of promiscuity is self-reinforcing because the presence of strains  
454 using multiple strategies in the population also favors the presence of accessory genes and  
455 core gene haplotypes that have high or intermediate fitness on multiple backgrounds.

456

457 On the other hand, an absence of intermediate genotypes in the population can favor the  
458 evolution of fastidiousness, with particular accessory genes and haplotypes becoming  
459 essential components of some genetic backgrounds but deleterious on others. A likely  
460 scenario is that differences between IG1.1 and IG1.2 at a lateral flagellar gene made  
461 recombinants between the two versions of the gene inviable and also created divergent

462 selection at a handful of other loci that was largely independent of the external environment  
463 or of interactions with other genes. The evolution of fastidiousness, like the evolution of  
464 promiscuity, can be self-reinforcing, and might have led to progressive increase in the  
465 differentiation of EG1.2 strains from EG1.1 until the coadaptation of IG1.2 variants to each  
466 other and of IG1.1 variants to each other became more-or-less irreversible, like marriage in  
467 England prior to the reign of King Henry VIII.

468

#### 469 **Coadapted gene complexes as speciation triggers**

470 Running the tape forward, it is easy to envisage the number of coadapted regions of the  
471 genome within IG1 undergoing progressive enlargement, until the entire genome becomes  
472 differentiated. As coadapted regions become more numerous, the proportion of  
473 recombination events between eco-groups that are maladaptive will increase, which might  
474 prompt the evolution of mechanistic barriers to genetic exchange between them.

475

476 Mechanisms by which new bacterial species arise are frequently discussed in the literature  
477 (25-27) but there is currently little data on how the process unfolds. IG1 is of interest both as  
478 an example of an intermediate stage of divergence, prior to speciation, and because it  
479 suggests that substantial adaptive divergence between gene pools can precede any barriers to  
480 genetic exchange, other than natural selection at the loci involved. This – unique to our  
481 knowledge – example is exciting because the distinct signature of selection should make it  
482 possible to dissect the genetic basis of coadaptation in unprecedented detail. Broadly similar  
483 patterns of differentiation including “genomic islands of speciation” have been observed for  
484 example between ecomorphs of cichlid fishes (28), but the evolution of ecomorphs has been  
485 facilitated by fish preferring to mate with similar individuals, which will have also inevitably  
486 lead to some level of differentiation at neutral loci throughout the genome.



487

## 488 **Conclusions**

489 In *V. parahaemolyticus*, it has been possible to distinguish clearly between adaptive  
490 processes, reflecting fitness interactions between genes and neutral ones, reflecting clonal and  
491 population structure. This has allowed us to provide a description of the landscape of  
492 coadaptation, involving multiple simple interactions and a small number of complex ones.  
493 We have focused on interactions that generate strong linkage disequilibrium, but weaker and  
494 more complex polygenic ones also have the potential to provide biological insight.

495

496 Most bacteria have population structure that deviates more markedly from panmixia (10). In  
497 some species this is likely due to smaller effective population sizes, lower recombination  
498 rates or mechanistic barriers to genetic exchange between strains. However, coadaptation can  
499 itself generate genome-wide linkage disequilibrium that might be difficult to distinguish from  
500 clonal or population structure. Because the linkage disequilibrium associated with IG1 is  
501 highly localized within the genome, it can, on careful inspection be clearly be attributed to  
502 selection, but in other bacteria patterns are likely to be less straightforward, making it  
503 challenging to understand to whether adaptive processes drive population structure, or vice  
504 versa. Natural selection is the jewel of evolution but distinguishing it from other processes  
505 requires in depth understanding of the relevant biology in addition to suitable data and  
506 statistical methods.

507

## 508 **Materials and Methods**

### 509 **Genomes used in this work**

510 Totally 1,103 global *V. parahaemolyticus* genomes were used in this work (Table S1), which  
511 also were analyzed in our other studies (8, 10). To reduce clonal signals, we firstly made a

512 “non-redundant” dataset of 469 strains, in which no sequence differed by less than 2,000  
513 SNPs in the core genome. They were attributed to 4 populations, VppAsia (383 strains),  
514 VppX (43), VppUS1 (18) and VppUS2 (21) based on fineSTRUCTURE result (29). We then  
515 focused on VppAsia which has more strains, to generate a genome dataset in which strains  
516 represent a freely recombining population. We selected 386 genomes from 469 non-  
517 redundant genome dataset, including all the 383 VppAsia genomes and 3 outgroup genomes  
518 which were randomly selected from VppX, VppUS1 and VppUS2 population, respectively.  
519 These 386 genomes were used in Chromosome painting and fineSTRUCTURE analysis (29)  
520 as previously described (11). Initial fineSTRUCTURE result revealed multiple clonal signals  
521 still exist, thus we selected one representative genome from each clone, combined them with  
522 the remaining genomes and repeated the process. After 14 iterations, we got a final dataset of  
523 201 genomes with no trace of clonal signals, involving 198 VppAsia genomes that were used  
524 in further analysis.

525

526 The copy probability value of each strain at each SNP was generated by Chromosome  
527 painting with “-b” option, and the average copying probability value of a given strain group  
528 (e.g. EG1.2) at each SNP was used in Figure 4, 5 and Figure S4.

529

### 530 **Variation detection, annotation and phylogeny**

531 We re-called SNPs for 198 VppAsia genomes by aligning the assembly against reference  
532 genome (RIMD 2210633) using MUMmer (30) as previous described (11). Totally 565,466  
533 bi-allelic SNPs were identified and 151,957 bi-allelic SNPs with minor allele frequency > 2%  
534 were used in coadaptation detection. We re-annotated all the assemblies using Prokka (31),  
535 and the annotated results were used in Roray (32) to identify the pan-genome and gene  
536 presence/absence, totally 41,052 pan-genes were found and 14,486 accessory genes (present

537 in > 2% and < 98% strains) were used in coadaptation detection. The pan-gene protein  
538 sequences of Roary were used to BLAST (BLASTP) against COG and KEGG database to get  
539 further annotation.

540

541 The Neighbour-joining trees were built by using the TreeBest software  
542 (<http://treesoft.sourceforge.net/treebest.shtml>) based on sequences of concatenated SNPs, and  
543 were visualized by using online tool iTOL (33).

544

### 545 **Detection of coadapted loci**

546 Totally 151,957 bi-allelic SNPs and 14,486 accessory genes identified from 198 independent  
547 VppAsia genomes were used in coadaptation detection by three methods. Firstly we used  
548 Fisher exact test to detect the linkage disequilibrium of each SNP-SNP, SNP-accessory gene,  
549 and accessory gene-gene pair. Presence or absence of an accessory gene was considered as its  
550 two alleles. Each variant locus (SNP or accessory gene) has two alleles, major and minor, of  
551 which major represents the allele shared by majority of isolates. For each pair of loci X and  
552 Y, the number of combinations between  $X_{\text{major}}-Y_{\text{major}}$ ,  $X_{\text{major}}-Y_{\text{minor}}$ ,  $X_{\text{minor}}-Y_{\text{major}}$ ,  $X_{\text{minor}}-Y_{\text{minor}}$   
553 were separately counted and used in the contingency table to calculate the Fisher exact test  $P$   
554 value. It took 3 days to finish all the coadaptation detection in a computer cluster using 21  
555 cores and 2 Gb memory. We also used SuperDCA (13) and SpydrPick (14) to detect the  
556 coadaptation between SNPs, using the same subset of 198 strains to make the analysis as  
557 comparable as possible. SuperDCA is based on direct coupling analysis (DCA) model (12)  
558 and has a much faster calculation speed compared with previous DCA methods. However, it  
559 still took 25 days to finish the detection by using 32 cores and 86 Gb memory. SpydrPick  
560 took one hour to finish the calculation by using 32 cores and 1 Gb memory.

561

562 We removed coadaptation pairs with distance less than 3 kb to minimize the influence of  
563 physical linkage. All identified SNPs in this study were located in the core genome, therefore  
564 the physical distance between SNP pairs can be calculated according to their position in the  
565 reference genome. To define the distance between accessory genes, and between SNP and  
566 accessory gene, we mapped the sequence of accessory genes against available 19 complete  
567 maps of the *V. parahaemolyticus* genomes to acquire their corresponding position, and then  
568 the gene that failed to be found in complete reference genomes were then mapped to the draft  
569 genomes. If the accessory genes pair or SNP- accessory gene pair was found located in a  
570 same chromosome or same contig of a draft genome, then the distance between paired  
571 variants could be counted according to their position in the chromosome or contig. The  
572 distance between paired variants that located in different chromosomes or contigs was  
573 counted as larger than 3 kb and such pairs were kept in further analysis. Circos (34) was used  
574 to visualize the networks of coadaptation SNPs in Figure 1f and Figure S3.

575

#### 576 **Lateral flagellar gene cluster region in *Vibrio* genus**

577 To identify the homologous sequences of *V. parahaemolyticus* lateral flagellar gene cluster  
578 (VPA1538-1557) in the *Vibrio* genus, we downloaded all available *Vibrio* genome sequences  
579 in NCBI, then aligned the nucleotide sequence of lateral flagellar gene cluster of *V.*  
580 *parahaemolyticus* (NC\_004605.1639906-1657888) against *Vibrio* genome dataset  
581 (excluding *V. parahaemolyticus*) by using BLASTN. Totally 46 *Vibrio* genomes revealed  
582 above than 60% coverage on lateral flagella region in *V. parahaemolyticus* genome and was  
583 used in phylogeny rebuilding. We also included three randomly selected strains from EG1.1  
584 and EG1.2 respectively for comparison. In total 3,000 SNPs were identified in this region and  
585 were used for NJ tree construction.

586

587 **Determination of phenotypes**

588 **Bacteria strains.** In the phenotype experiments, totally 11 strains were randomly selected  
589 respectively from two EGs that defined by IG1 variants, including 7 EG1.1 strains (B1\_10,  
590 B1\_3, B2\_10, B4\_8, C1\_5, C5\_2, C6\_5) and 4 EG1.2 strains (B1\_1, B3\_1, B5\_2, C3\_10).  
591 The strains stored at -80 °C were inoculated in the thiosulfate citrate bile salts sucrose agar  
592 (TCBS) plates by streak plate method. Five clones for each strains were inoculated again in  
593 another TCBS plate and then cultured overnight at 30 °C in 3% NaCl-LB broth overnight and  
594 used for the following assays.

595

596 **Motility assays.** Five clones for each strain were cultured overnight at 30 °C and then  
597 inoculated in the swimming plate (LB media containing 0.3% agar) and swarming plate (LB  
598 agar with 3% NaCl ). The swimming ability was recorded by measuring the diameter of  
599 colony after 24 hours at 30 °C. And the swarming ability was recorded after 72 hours at 24 °

600 C.

601

602 **Growth curve.** *V. parahaemolyticus* strains in 96-well plate were cultured overnight at 30 °C  
603 in 3% NaCl-LB broth. The optical density of each culture was adjust to an OD<sub>600</sub> of 0.6. Then  
604 1 ml of each culture was inoculated 100 ml of 3% NaCl-LB broth in a 96-well plate and  
605 cultured at 30 °C. The growth of each culture were measured every 1 hour at the optical  
606 density of 600 nm using Multiskan Spectrum.

607

608 **Biofilm formation.** *V. parahaemolyticus* strains were cultured overnight at 30 °C in 3%  
609 NaCl-LB broth. 2 µl of each overnight culture was inoculated to 100 µl of 3% NaCl-LB broth  
610 in a 96-well plate and cultured at 30 °C for 24 h statically. The supernatant was discarded and

611 each well was washed once with sterile phosphate-buffered saline (PBS). 0.1% Crystal violet  
612 (wt/vol) was added to each well and incubated at room temperature for 30 min. The crystal  
613 violet was decanted, and each well was washed once with sterile PBS. Crystal violet that  
614 stained biofilm was solubilized with dimethylsulfoxide (DMSO), and then measured at the  
615 optical density of 595 nm using Multiskan Spectrum (Thermo Scientific).

616

### 617 **Acknowledgements**

618 This work is supported by the National Key Research & Development Program of China (No.  
619 2017YFC1601503, 2016YFC1200100, and 2017YFC1200800), Sanming Project of  
620 Medicine in Shenzhen (No. SZSM201811071), the National Natural Science Foundation of  
621 China (No. 31770001) and the Key Research Program of the Chinese Academy of Sciences  
622 (No. ZDRW-ZS-2017-1). D.F. is funded by a Medical Research Council Fellowship as part  
623 of the MRC CLIMB consortium for microbial bioinformatics (grant number  
624 MR/M501608/1).

625

### 626 **Author Contributions**

627 D. F., Y. C., and R. Y. designed the study and coordinated the project; Y. C., C. Y., and D. F.  
628 analyzed the data; H. Q. and H. W. performed phenotype experiments; D. F. and Y. C. wrote  
629 the manuscript. All authors approved the final version of the manuscript.

630

### 631 **Conflict of interest**

632 The authors declare that they have no conflict of interest.

633

### 634 **References**

635 1. Darwin C. The origin of species. 6th. John Murray, London; 1859.

- 636 2. Neher RA, Shraiman BI. Statistical genetics and evolution of quantitative traits. *Reviews of*  
637 *Modern Physics*. 2011;83(4):1283.
- 638 3. Pritchard JK, Przeworski M. Linkage disequilibrium in humans: models and data. *The*  
639 *American Journal of Human Genetics*. 2001;69(1):1-14.
- 640 4. Dobzhansky T. 1937 *Genetics and the origin of species*. New York: Columbia University  
641 Press. Dobzhansky *Genetics and the origin of species* 1937. 1970.
- 642 5. Wallace B. Coadaptation revisited. *The Journal of heredity*. 1991;82(2):89-95.
- 643 6. Makino K, Oshima K, Kurokawa K, Yokoyama K, Uda T, Tagomori K, et al. Genome sequence  
644 of *Vibrio parahaemolyticus*: a pathogenic mechanism distinct from that of *V. cholerae*. *Lancet*.  
645 2003;361(9359):743-9.
- 646 7. Gibson B, Wilson DJ, Feil E, Eyre-Walker A. The distribution of bacterial doubling times in the  
647 wild. *Proceedings Biological sciences*. 2018;285(1880).
- 648 8. Yang C, Pei X, Wu Y, Yan L, Yan Y, Song Y, et al. Recent mixing of *Vibrio parahaemolyticus*  
649 populations. *bioRxiv*. 2018.
- 650 9. Arnold BJ, Gutmann MU, Grad YH, Sheppard SK, Corander J, Lipsitch M, et al. Weak Epistasis  
651 May Drive Adaptation in Recombining Bacteria. *Genetics*. 2018;208(3):1247-60.
- 652 10. Yang C, Cui Y, Didelot X, Yang R, Falush D. Why panmictic bacteria are rare. *bioRxiv*. 2018.
- 653 11. Cui Y, Yang X, Didelot X, Guo C, Li D, Yan Y, et al. Epidemic Clones, Oceanic Gene Pools, and  
654 Eco-LD in the Free Living Marine Pathogen *Vibrio parahaemolyticus*. *Molecular biology and*  
655 *evolution*. 2015;32(6):1396-410.
- 656 12. Morcos F, Pagnani A, Lunt B, Bertolino A, Marks DS, Sander C, et al. Direct-coupling analysis  
657 of residue coevolution captures native contacts across many protein families. *Proceedings of the*  
658 *National Academy of Sciences*. 2011;108(49):E1293-E301.
- 659 13. Puranen S, Pesonen M, Pensar J, Xu YY, Lees JA, Bentley SD, et al. SuperDCA for genome-  
660 wide epistasis analysis. *Microbial genomics*. 2018.
- 661 14. Pensar J, Puranen S, MacAlasdair N, Kuronen J, Tonkin-Hill G, Pesonen M, et al. Genome-  
662 wide epistasis and co-selection study using mutual information. *BioRxiv*. 2019:523407.
- 663 15. Margolin AA, Nemenman I, Basso K, Wiggins C, Stolovitzky G, Dalla Favera R, et al., editors.  
664 ARACNE: an algorithm for the reconstruction of gene regulatory networks in a mammalian cellular  
665 context. *BMC bioinformatics*; 2006: BioMed Central.
- 666 16. Dobrindt U, Hochhut B, Hentschel U, Hacker J. Genomic islands in pathogenic and  
667 environmental microorganisms. *Nature reviews Microbiology*. 2004;2(5):414-24.
- 668 17. Tanabe T, Funahashi T, Okajima N, Nakao H, Takeuchi Y, Miyamoto K, et al. The *Vibrio*  
669 *parahaemolyticus* *pvuA1* gene (formerly termed *psuA*) encodes a second ferric vibrioferrin receptor  
670 that requires *tonB2*. *FEMS microbiology letters*. 2011;324(1):73-9.
- 671 18. Vos M, Eyre-Walker A. Are pangenomes adaptive or not? *Nature microbiology*.  
672 2017;2(12):1576.
- 673 19. Andreani NA, Hesse E, Vos M. Prokaryote genome fluidity is dependent on effective  
674 population size. *ISME J*. 2017;11(7):1719-21.
- 675 20. Shapiro BJ. The population genetics of pangenomes. *Nature microbiology*. 2017;2(12):1574.
- 676 21. Langille MG, Hsiao WW, Brinkman FS. Detecting genomic islands using bioinformatics  
677 approaches. *Nature reviews Microbiology*. 2010;8(5):373-82.
- 678 22. Salomon D, Gonzalez H, Updegraff BL, Orth K. *Vibrio parahaemolyticus* type VI secretion  
679 system 1 is activated in marine conditions to target bacteria, and is differentially regulated from  
680 system 2. *PloS one*. 2013;8(4):e61086.
- 681 23. Tischler AD, Camilli A. Cyclic diguanylate (c-di-GMP) regulates *Vibrio cholerae* biofilm  
682 formation. *Molecular microbiology*. 2004;53(3):857-69.
- 683 24. Sharp PM, Bailes E, Grocock RJ, Peden JF, Sockett RE. Variation in the strength of selected  
684 codon usage bias among bacteria. *Nucleic acids research*. 2005;33(4):1141-53.
- 685 25. Shapiro BJ, Friedman J, Cordero OX, Preheim SP, Timberlake SC, Szabo G, et al. Population  
686 genomics of early events in the ecological differentiation of bacteria. *Science*. 2012;336(6077):48-51.



- 687 26. Fraser C, Alm EJ, Polz MF, Spratt BG, Hanage WP. The bacterial species challenge: making  
688 sense of genetic and ecological diversity. *Science*. 2009;323(5915):741-6.
- 689 27. Falush D, Torpdahl M, Didelot X, Conrad DF, Wilson DJ, Achtman M. Mismatch induced  
690 speciation in *Salmonella*: model and data. *Philosophical transactions of the Royal Society of London*  
691 *Series B, Biological sciences*. 2006;361(1475):2045-53.
- 692 28. Malinsky M, Challis RJ, Tyers AM, Schiffels S, Terai Y, Ngatunga BP, et al. Genomic islands of  
693 speciation separate cichlid ecomorphs in an East African crater lake. *Science*. 2015;350(6267):1493-  
694 8.
- 695 29. Lawson DJ, Hellenthal G, Myers S, Falush D. Inference of population structure using dense  
696 haplotype data. *PLoS genetics*. 2012;8(1):e1002453.
- 697 30. Delcher AL, Salzberg SL, Phillippy AM. Using MUMmer to identify similar regions in large  
698 sequence sets. *Current protocols in bioinformatics*. 2003;Chapter 10:Unit 10 3.
- 699 31. Seemann T. Prokka: rapid prokaryotic genome annotation. *Bioinformatics*.  
700 2014;30(14):2068-9.
- 701 32. Page AJ, Cummins CA, Hunt M, Wong VK, Reuter S, Holden MT, et al. Roary: rapid large-scale  
702 prokaryote pan genome analysis. *Bioinformatics*. 2015;31(22):3691-3.
- 703 33. Letunic I, Bork P. Interactive tree of life (iTOL) v3: an online tool for the display and  
704 annotation of phylogenetic and other trees. *Nucleic acids research*. 2016;44(W1):W242-5.
- 705 34. Krzywinski M, Schein JI. Circos: an information aesthetic for comparative genomics. *Genome*  
706 *Research*. 2009;19(9):1639-45.

707

## 708 **Figure legends**

709 **Figure 1. Detection of coadaptation loci in *V. parahaemolyticus*.** (a) NJ tree of 198  
710 *VppAsia* strains based on 151,957 bi-allelic SNPs (minor allele frequency > 2%) (b) Q-Q plot  
711 of Fisher exact test *P* values between genetic variants. The vertical dotted line shows the  
712 threshold  $P = 10^{-10}$ . (c) Hierarchical clustering of interacting variants (column and row) in the  
713 largest network based on Fisher exact test *P* value. IG2-1 and IG2-2 were integrated into IG2.  
714 (d) Distribution of SuperDCA coupling strength value. (e) Correlation between Fisher exact  
715 test *P* value and SuperDCA coupling strength (red), and between Fisher exact test *P* value  
716 and SpydrPick mutual information (blue). (f) Overlap of strong linked SNP sites detected by  
717 Fisher exact test ( $P < 10^{-10}$ , excluding IG1 variants) and SuperDCA (coupling strength >  $10^{-2.2}$ ).  
718 Red for interacted SNP pairs detected by both methods, blue for SNP pairs detected only  
719 by Fisher exact test. Only SNP/accessory gene pairs with distance > 3 kb were included in  
720 (c,e and f).

721



722 **Figure 2. Landscape of coadaptation (excluding IG1-3).** (a) Gene maps of different IGs.  
723 Arrows indicate genes and red for detected coadaptation core genes, blue for accessory genes  
724 and orange for genes with no coadaptation signal. Black vertical lines indicate SNPs in the  
725 interaction group. The colors of the bar on the left indicates average linkage strength of the  
726 loci in each IG. Vertical dotted lines were used to split compatible genes with physical  
727 distance larger than 3 kb, or genes located in different contigs, chromosomes and strains.  
728 Dotted rectangles indicate incompatible genes. IGs with genome block length larger than 60  
729 kb are broken by double slash and shown in (b) after zooming out. COG classification labels  
730 are shown above the genes. (c) COG classification and GC content of all the genes used in  
731 detection (top) and of different types of coadaptation genes. Red for core genes and blue for  
732 accessory genes. The first number in brackets is the number of genes with COG annotation  
733 and the second is the total number of genes in the category.

734

735 **Figure 3. Representative interaction groups.** Hierarchical clustering of 469 non-redundant  
736 strains (columns) based on coadaptation loci (rows) of 4 representative IGs. Colors of the  
737 heatmap indicate the status of genetic variants, with light orange/orange for two alleles of a  
738 SNP, light yellow/brown for absence and presence of the accessory genes. Bar colors below  
739 the tree on the top indicate the populations of strains according to the legend. Function  
740 summary of involved genes is shown on the top of each heatmap. Arcs on the right indicate  
741 the causal links after ARACNE filtering, colors and the width of the arcs scale with the  $P$   
742 values.

743

744 **Figure 4. Interaction group 1.** (a) Hierarchical clustering of 469 non-redundant strains  
745 (columns) based on coadapted loci (rows) of IG1. Color scheme of the heatmap is the same  
746 as in Figure 3. Branch colors of the tree on the top indicate the populations of strains

747 according to the legend. The black bars below the tree indicate the strains used in  
748 experiments. Branch colors of the tree on the left indicate the tiers of coadaptation loci, with  
749 red, blue and green for tier 1, 2 and 3, respectively. The same colors are used for tiers of  
750 coadaptation in panel (b) and (c). Colors of the bar on the right indicate the genome position  
751 of coadaptation loci, which is corresponding to the bar colors in panel (b). Arcs on the right  
752 indicate the causal links as in Figure 3, the links within the genome block in (b) were  
753 removed and only one link between different blocks was shown. (b) Gene map of  
754 coadaptation genome blocks of IG1. Two reference genomes were used to show coadaptation  
755 variants in IG1. The left curve indicates the value of average copy probability of EG1.2  
756 strains that copied from themselves throughout the genome of Ref1, with vertical dotted line  
757 indicates the expect value (number of EG1.2 strains /number of all strains). The bars indicate  
758 the reference genomes and different chromosomes are separated by a horizontal short bar.  
759 The labels of coadaptation genome blocks are shown above them and are corresponding to  
760 information in Table S2. Arrows and vertical lines separately indicate genes and SNPs, which  
761 were colored according to different coadaptation tiers, and core genes were colored grey and  
762 genes with no coadaptation signal were light orange. COG classification labels are shown  
763 above the genes. (c) The distribution of coadaptation SNPs in the lateral flagellar gene cluster  
764 region (VPA1538-1557). The top indicates the gene organization of lateral flagellar gene  
765 cluster. Light orange rectangles show the accessory genome region. The histograms indicate  
766 the distribution of SNPs along the gene cluster, with colors of bars indicate coadaptation tiers.

767

768 **Figure 5. Interaction group 2 (a) and 3 (b).** Layout and colors are the same as in Figure 4.  
769 EG1.2 and EG2.1 strains are shown below the tree on the top for comparison (black bars).  
770 The left curves indicate the average copy probability value of EG2.1 (a) and EG3.1 (b) strains  
771 copy from themselves throughout the reference genome, respectively. Twenty randomly

772 selected SNPs separately from IG2-1 and IG2-2 were used in hierarchical clustering to  
773 minimize the influence of number of variants.

774

775 **Figure 6. Phenotypes of 7 EG1.1 and 4 EG1.2 strains.** (a) Swimming and swarming  
776 ability. (b) Growth curve. (c) Biofilm formation and colony morphology. Strains used in  
777 experiments were randomly selected and were marked in Figure 4a.

778

779 **Figure 7. Overview of four stages of coadaptation.** Circles indicate bacterial strains within  
780 a population. Stars indicate SNPs, with red and green indicating the two alleles. Blue  
781 rectangles indicate accessory genes or genome islands. Arrows indicate the transitions  
782 between stages. Casual interactions involve genes and SNPs coming and going on all genetic  
783 backgrounds. Steady interactions involve particular genes that are associated with each other  
784 but with frequent exceptions due to ongoing genetic flux and coadaptation with other loci.  
785 Married interactions involve a core of fastidiously associated loci with other loci that lead to  
786 further co-adaptation in multiple genome regions. The horizontal line in the fourth stage  
787 indicates a barrier to gene flow entailing speciation.

**Table1. Summary of interactions detected in coadaptation screen.**

|                          | Total <sup>*</sup>   | Network 1 |      |      |      |                         | IG5-93 | Frequency <sup>***</sup> |
|--------------------------|----------------------|-----------|------|------|------|-------------------------|--------|--------------------------|
|                          |                      | IG1       | IG2  | IG3  | IG4  | Frequency <sup>**</sup> |        |                          |
| SNP-SNP pair             | 2.3×10 <sup>10</sup> | 283632    | 4398 | 1150 | 6    | 0.00%                   | 22751  | 0.00%                    |
| SNP-Accessory gene pair  | 2.2×10 <sup>9</sup>  | 104096    | 7319 | 2446 | 112  | 0.01%                   | 1188   | 0.00%                    |
| Accessory gene-gene pair | 2.1×10 <sup>8</sup>  | 7999      | 2823 | 973  | 1692 | 0.01%                   | 12264  | 0.01%                    |
| SNP number               | 151957               | 917       | 548  | 75   | 63   | 1.05%                   | 333    | 0.22%                    |
| Synonymous (Syn)         | 117541               | 626       | 409  | 49   | 38   | 0.95%                   | 226    | 0.19%                    |
| Nonsynonymous (NonSyn)   | 23673                | 236       | 122  | 21   | 21   | 1.69%                   | 107    | 0.45%                    |
| NonSyn/Syn               | 0.2                  | 0.38      | 0.30 | 0.43 | 0.55 |                         | 0.47   |                          |
| Core gene                | 3936                 | 62        | 20   | 6    | 4    | 2.34%                   | 18     | 0.56%                    |
| Accessory gene           | 14486                | 152       | 130  | 65   | 124  | 3.25%                   | 1122   | 7.75%                    |

\* All of the variations used in coadaptation screen.

\*\* Ratio of the number of variations in Network 1 to the total number of variations.

\*\*\* Ratio of the number of variations in IG5-93 to the total number of variations.

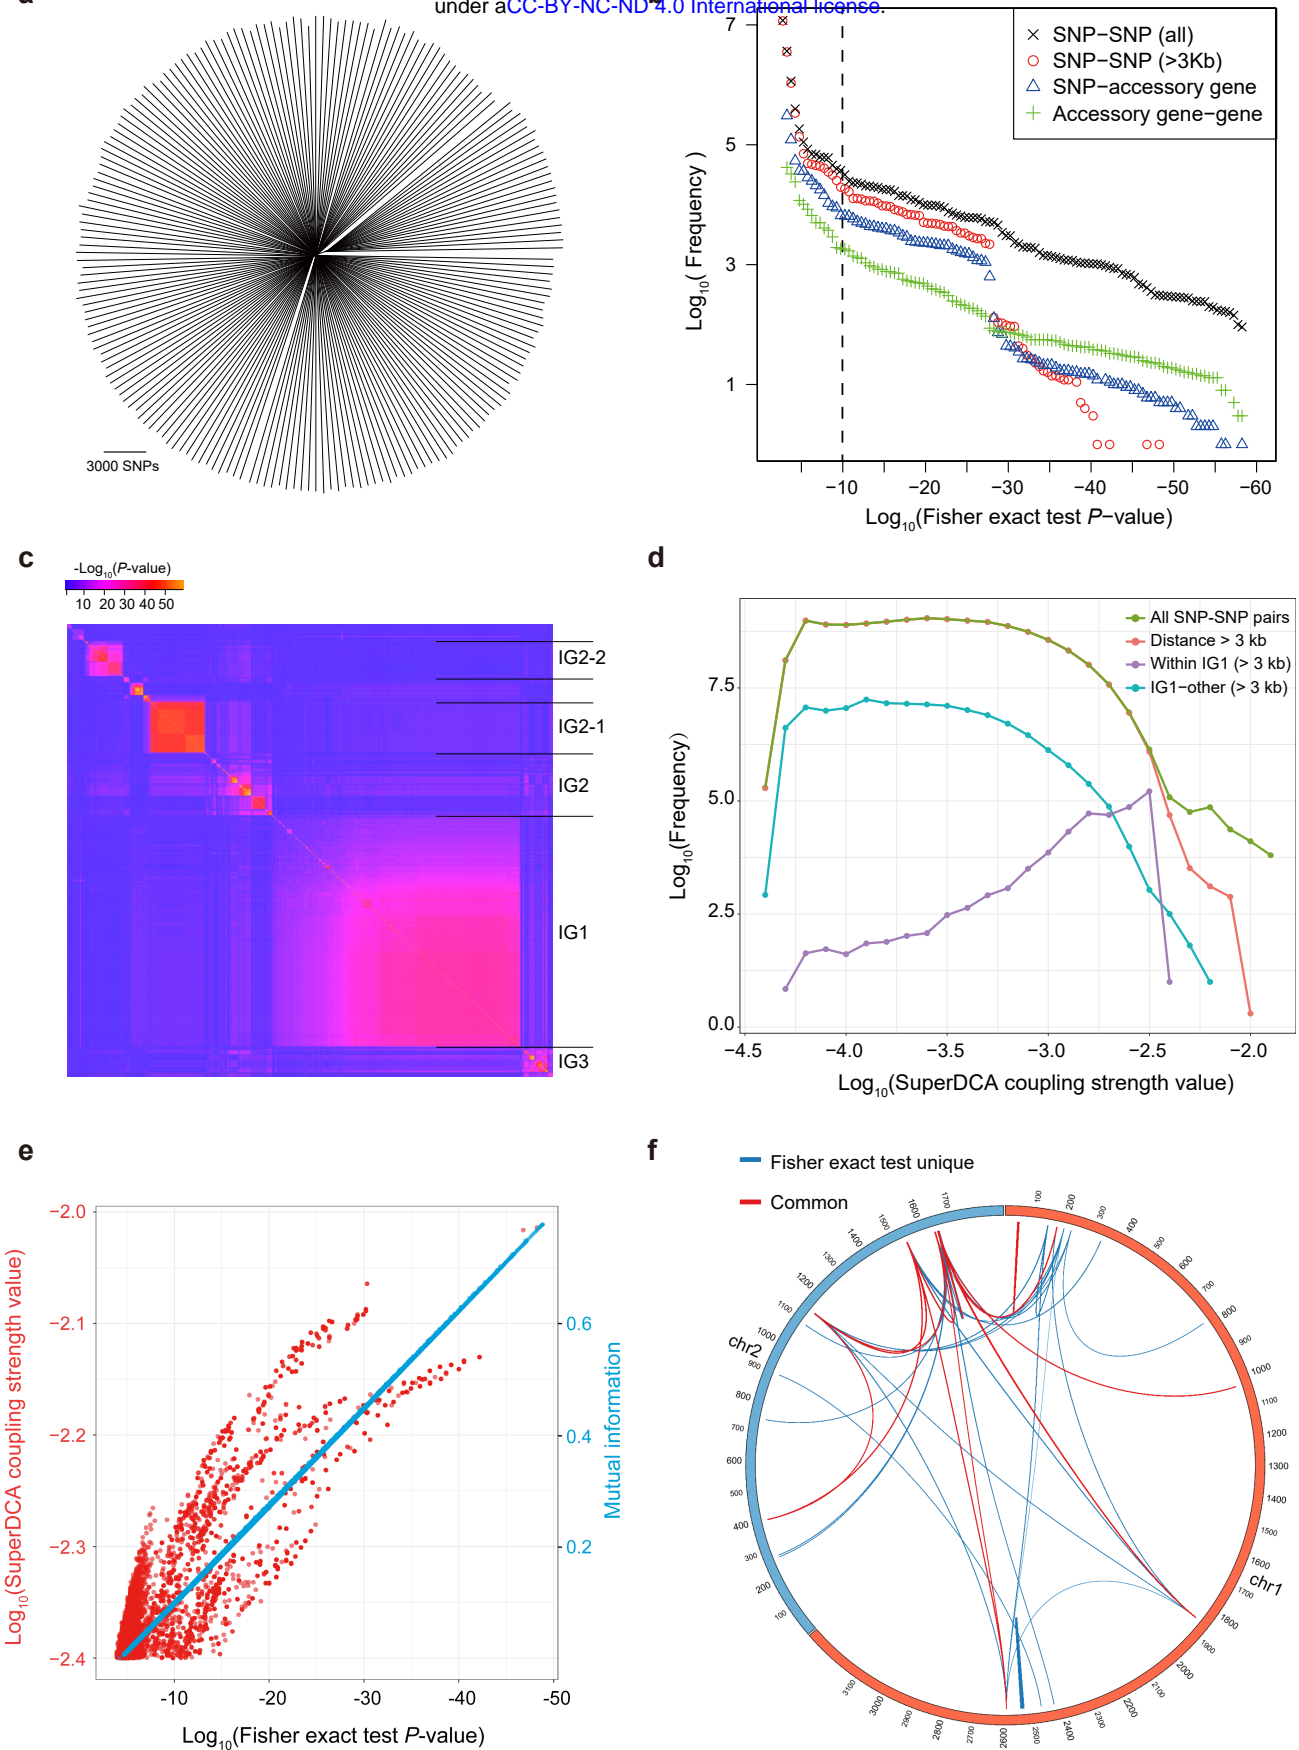

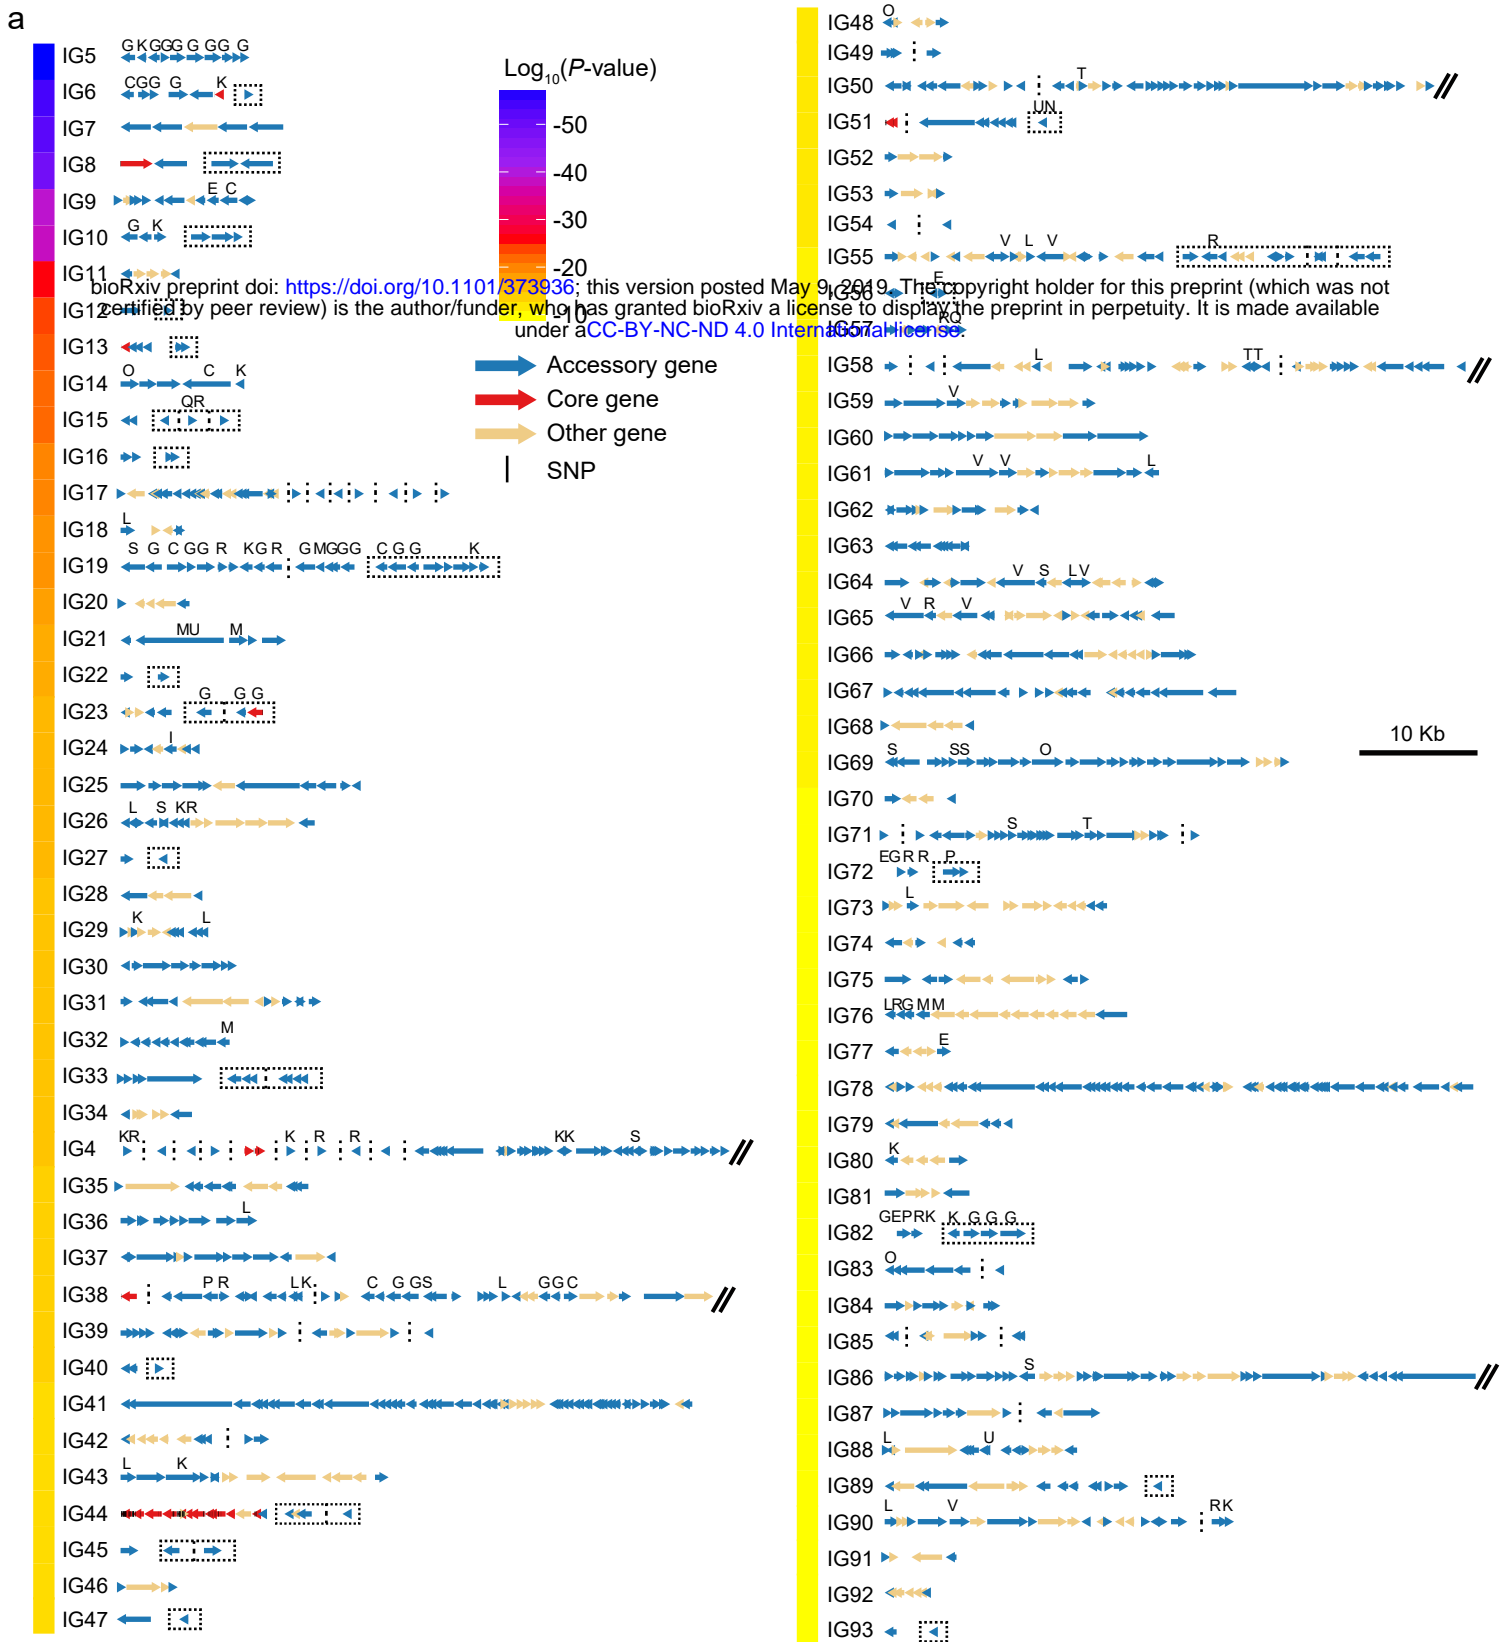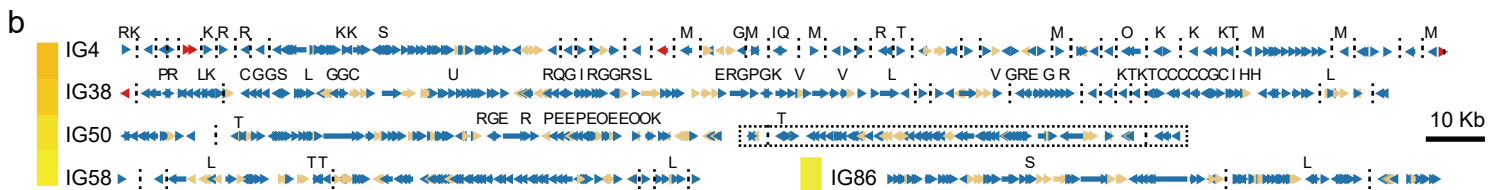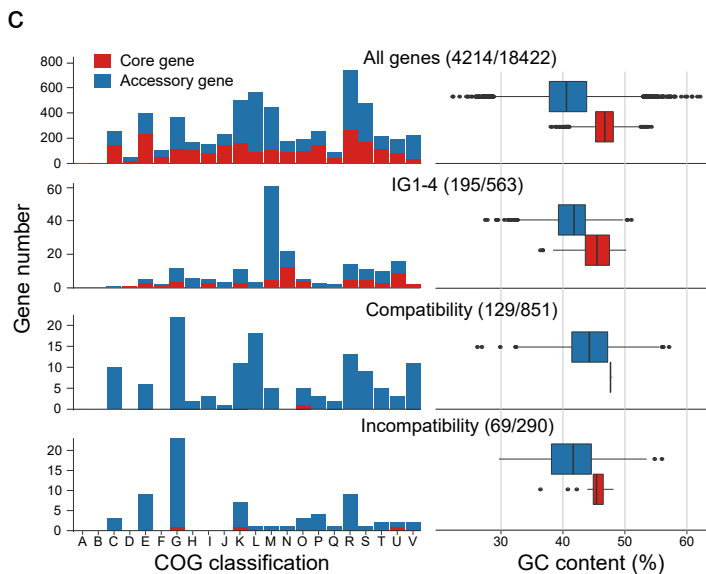

| COG classification                                            |                                                                  |
|---------------------------------------------------------------|------------------------------------------------------------------|
| A: RNA processing and modification                            | L: Replication, recombination and repair                         |
| B: Chromatin structure and dynamics                           | M: Cell wall/membrane/envelope biogenesis                        |
| C: Energy production and conversion                           | N: Cell motility                                                 |
| D: Cell cycle control, cell division, chromosome partitioning | O: Posttranslational modification, protein turnover, chaperones  |
| E: Amino acid transport and metabolism                        | P: Inorganic ion transport and metabolism                        |
| F: Nucleotide transport and metabolism                        | Q: Secondary metabolites biosynthesis, transport and catabolism  |
| G: Carbohydrate transport and metabolism                      | R: General function prediction only                              |
| H: Coenzyme transport and metabolism                          | S: Function unknown                                              |
| I: Lipid transport and metabolism                             | T: Signal transduction mechanisms                                |
| J: Translation, ribosomal structure and biogenesis            | U: Intracellular trafficking, secretion, and vesicular transport |
| K: Transcription                                              | V: Defense mechanisms                                            |

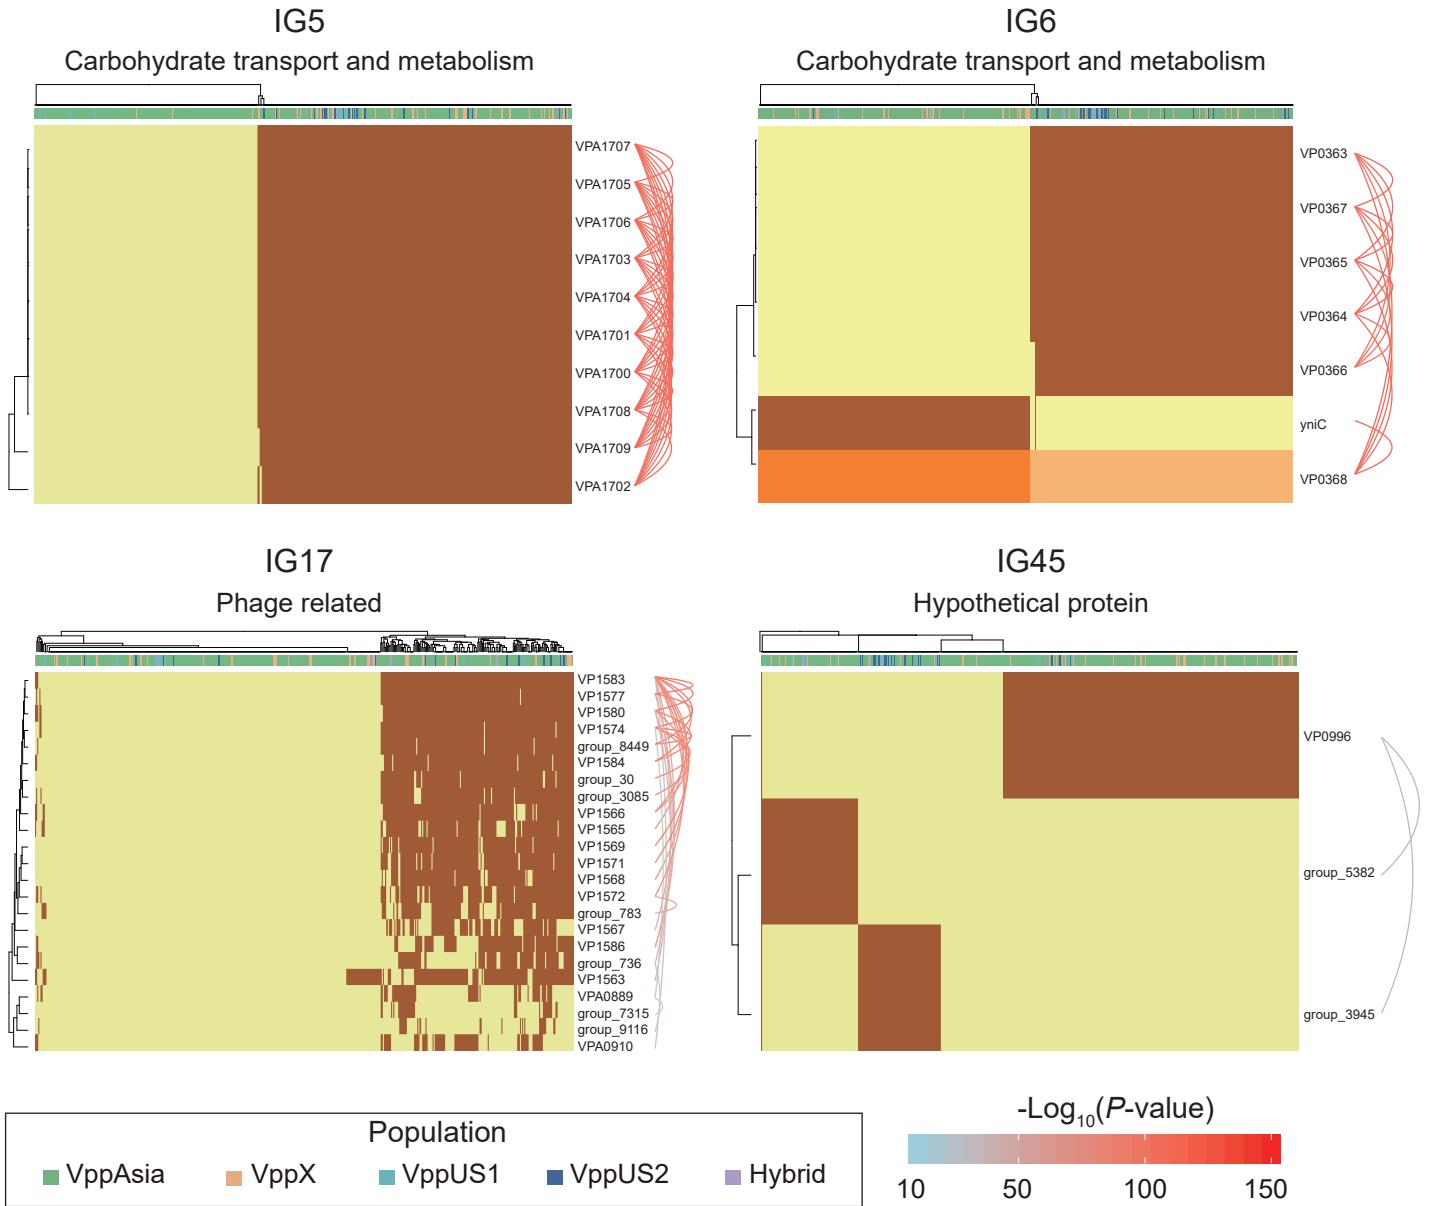

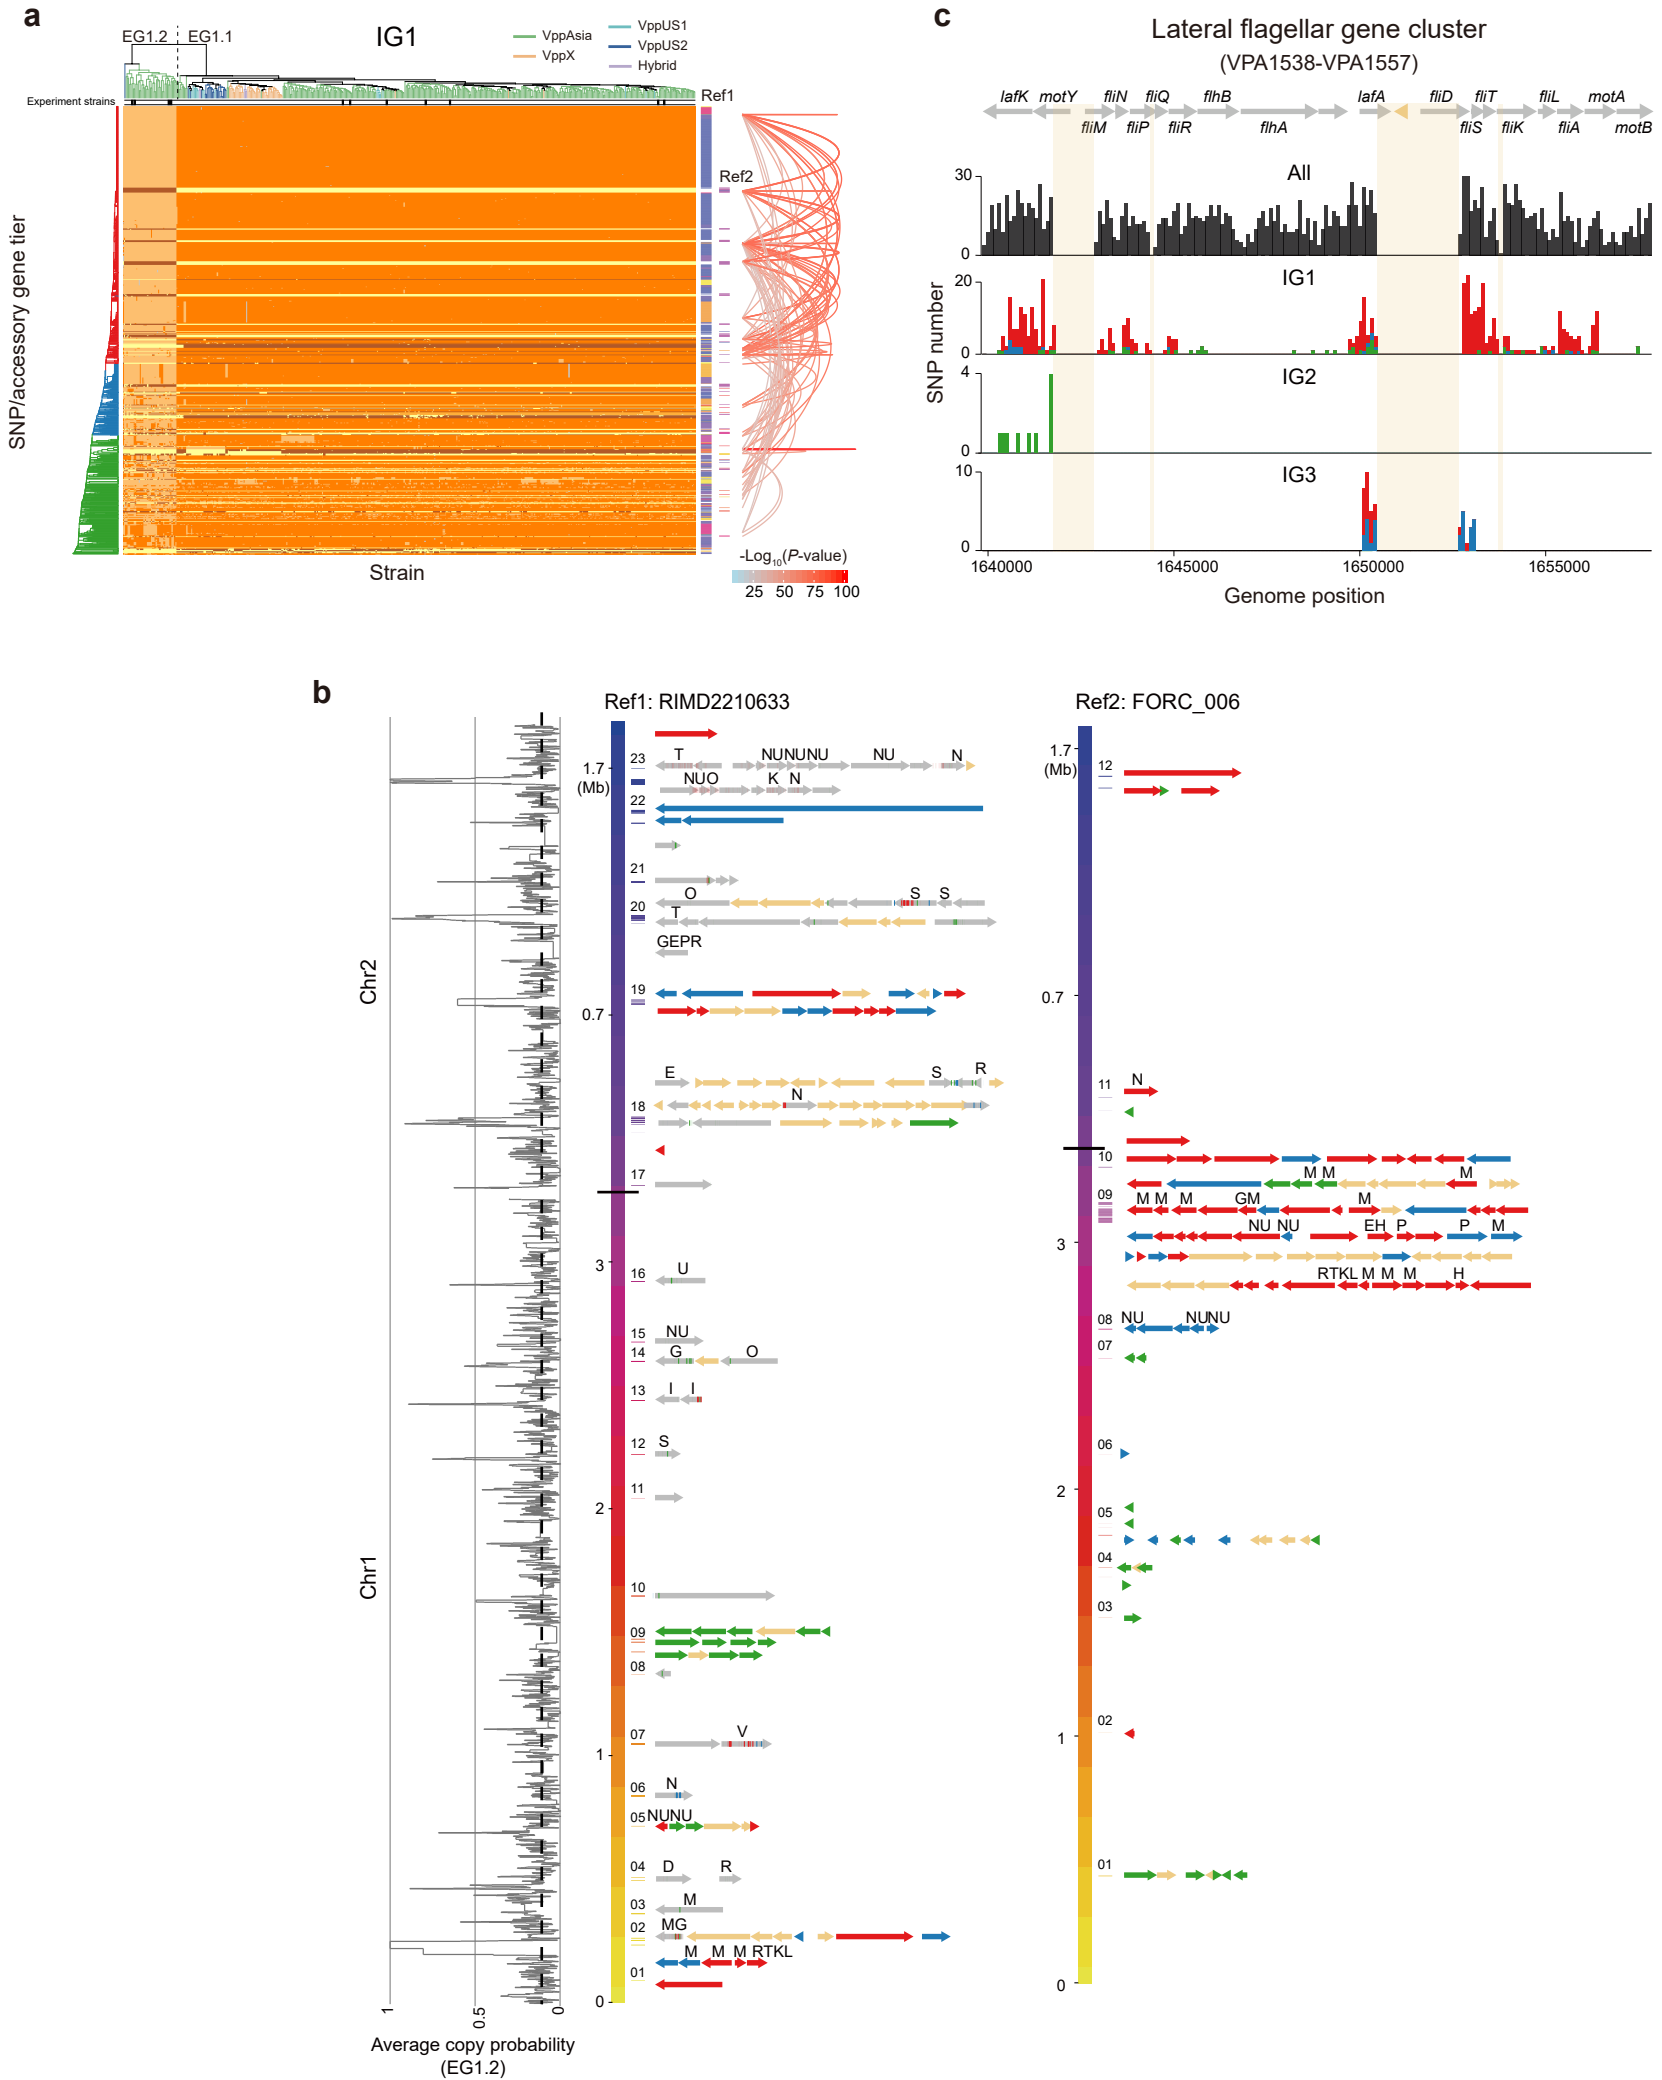





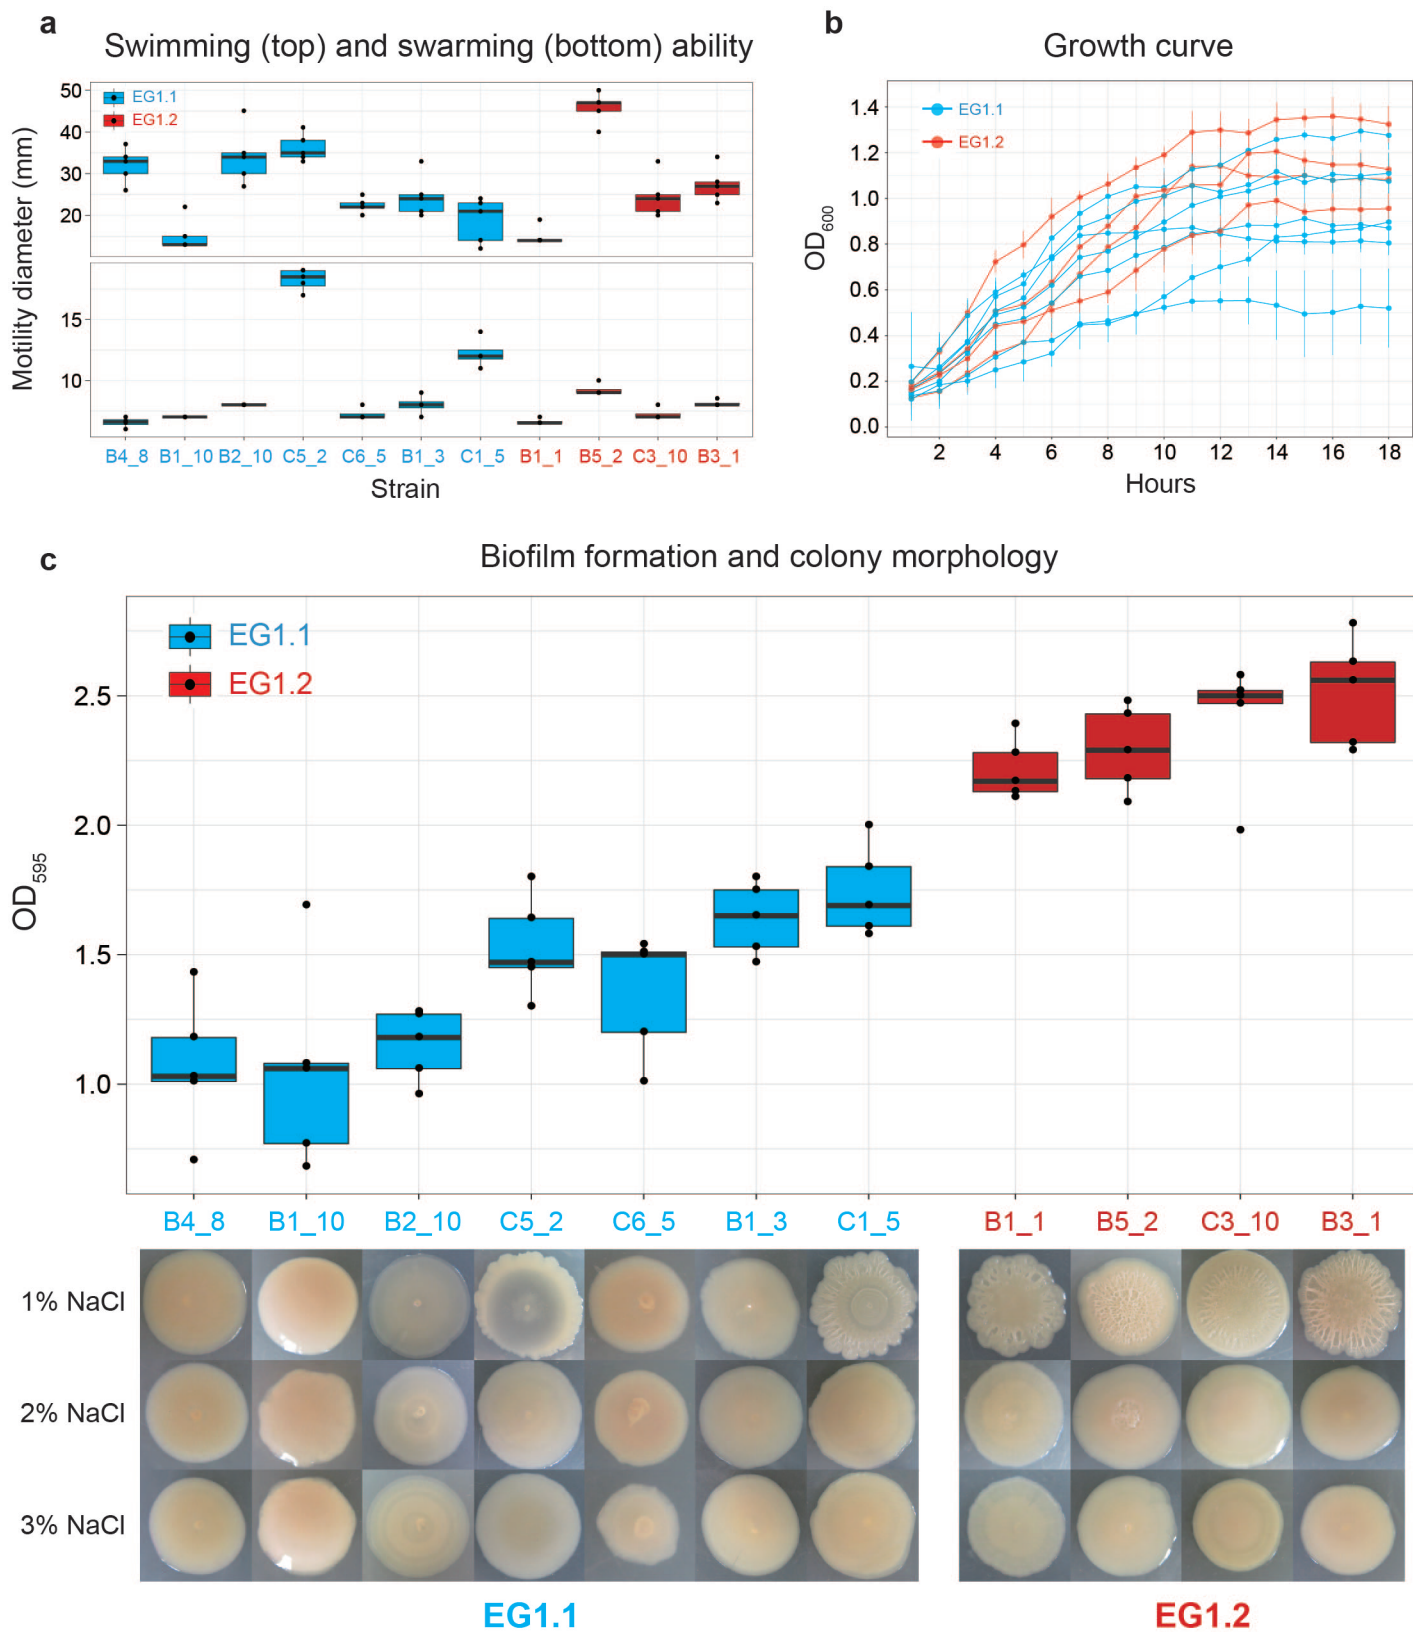

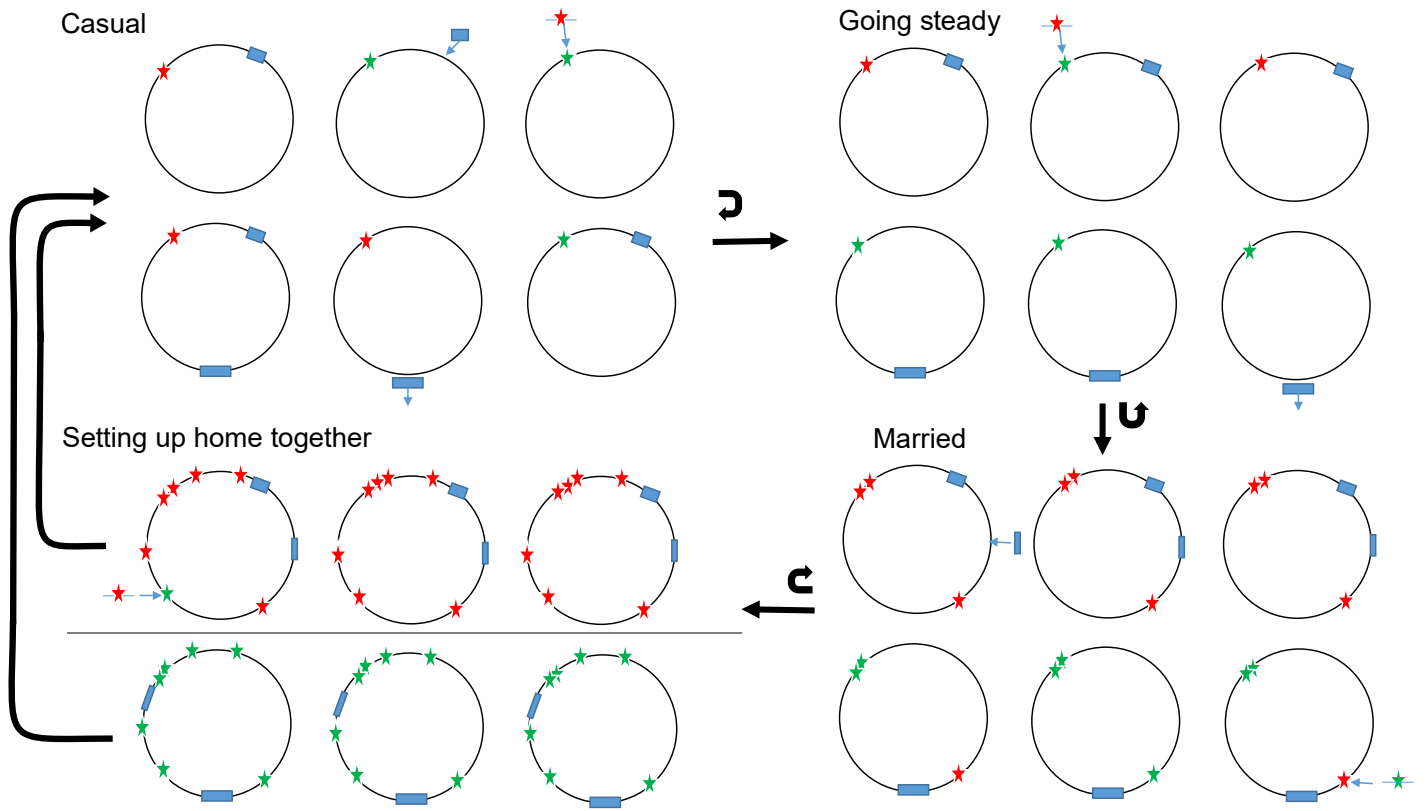

Source: https://www.biorxiv.org/content/10.1101/373936v3.full.pdf
